# Supplementary material for: Heterozygous loss of function of IQSEC2/Iqsec2 leads to increased activated Arf6 and severe neurocognitive seizure phenotype in females
Source: Life Sci Alliance. 2019 Aug 22;2(4):e201900386. doi: 10.26508/lsa.201900386 (PMC6706959; doi:10.26508/lsa.201900386)
Supplement: Supplementary file 1 [file LSA-2019-00386_TableS1.xlsx]

## Sheet: Sheet1
Supplemental Table1: Primer sets for genotyping and exon amplification.
	Sequence 5’-3’	Use
Intron 2 forward	TCCTGTGCCAGCCAGAGAGAT	Genotyping founders (genomic)
Intron 4 reverse	GCTCTACTCCTGAGCTACATCCC
Genotyping forward	ACCATCCTAGGGAAACAAGAGG	Genotyping of founder A progeny (genomic)
Iqsec2 KO reverse	AAGTTGCCAGAGCCTCAACC
Wild-type reverse	CCAGGACTATCAACCGCTG
Sry forward	CCAACACTCCCCCTTGCTAT	Sex determination (genomic)
Sry reverse	ACCACAAAGCTGTTTGCTGTC
Exon 2 long forward	TGAGCCCAGCTAGTTCTGTC	Exon 2 long isoform amplification (genomic)
Exon 2 long reverse	TAATGAGCCCCTGAGGTGTG
Exon 2 short forward	GTCTCTACTGCCCCCTGTTG	Exon 2 short isoform amplification (genomic)
Exon 2 short reverse	CCAGTCTACCCAAATGGCAGT
Exon 3 forward	CCTGAGCACAGCGGTTGATA	Exon 3 amplification (genomic)
Exon 3 reverse	CTTGGAGCGCTTGATCTCCT
Exon 4 forward	AGCTCGAGGACTCCTTCTCC	Exon 4 amplification (genomic)
Exon 4 reverse	CCCTCGAAGTATGCAGG
Exon 5 forward	ACTGACCCACCAGGAAGATTT	Exon 5 amplification (genomic)
Exon 5 reverse	CCAGTACCACTATTGGGGGC
Exon 2/3 forward	CCAGAACAGTCAGTGTGGAGGGTGATG	Cortical expression profile (cDNA)
Exon 4 reverse	CCCTCGAAGTATGCAGG
Short isoform forward	ACCAGTACCAGCACCAGC	Short isoform expression (cDNA)
Exon 4 reverse b	CTCCTCTCCAGCATTTCC
Long isoform forward	GTCCTTGACTCCATGAAGCTTACC	Long isoform expression (cDNA)
Exon 4 reverse b	CTCCTCTCCAGCATTTCC
