# Supplementary material for: Heterozygous loss of function of IQSEC2/Iqsec2 leads to increased activated Arf6 and severe neurocognitive seizure phenotype in females
Source: Life Sci Alliance. 2019 Aug 22;2(4):e201900386. doi: 10.26508/lsa.201900386 (PMC6706959; doi:10.26508/lsa.201900386)
Supplement: Supplementary file 2 [file LSA-2019-00386_TableS2.xlsx]

## Sheet: Sheet1
Supplemental Table 2: Off-target analysis using two computational tools.
Guide	Total	Genes	Name	Score	Mismatch
CRISPR Design: true match = 100
Forward	146	12	Iqsec2	100	0
			Pdgfra	0.61	4
			Lonrf3	0.55	4
			Pkn2	0.34	4
			Sftpb	0.28	4
			Mir3074-2	0.27	4
			2810459MIIRIK	0.2	4
			Dsgla	0.12	4
			Med13	0.09	4
			Rab11fip2	0.05	4
			GM20597	0.04	4
			Aox4	0.01	4
Reverse	148	19	Iqsec2	100	0
			Iqsec3	0.71	4
			Dystonin	0.49	4
			Plod3	0.21	4
			Mtc11	0.16	4
			Apc2	0.16	3
			Tanc1	0.12	4
			Dpys	0.09	4
			Dpys13	0.08	4
			Dab2ip	0.08	4
			Prpf6	0.07	4
			Abca4	0.07	4
			Rpgrip1	0.06	4
			Nrd1	0.05	4
			Muc5b	0.05	4
			Utrn	0.05	4
			Exosc10	0.01	4
			Mmp25	0	4
			Lpp	0	4
COSMID: true match = 0
Forward	61	1	Iqsec2	0	0
Reverse	62	3	Iqsec2	0	0
			Iqsec3	6.91	2
			Rbbp8n1	7.25	3
Total = total number of predicted off-targets, Genes = number of off-targets within a gene coding region. CRISPR Design tool (http://crispr.mit.edu/) allows up to four mismatches and a true match is scored as 100. COSMID (https://crispr.bme.gatech.edu) computes off-targets of up to three mismatches and a true match is designated as 0.
